# Supplementary material for: Comparison of One-Year Functional Outcomes and Quality of Life between Posterior Pelvic Ring Fixation and Combined Anterior-Posterior Pelvic Ring Fixation after Lateral Compression (B2 Type) Pelvic Fracture
Source: MDPI journal article supplement (doi:10.3390/medicina57030204), 2021-02-26
Supplement: s1 [file s1]

**Table S1.** Detailed data on sacral displacement measurements by two radiologists (A and B) for the whole cohort of 32 patients

| Radiologist | Median | IQR        | df |
|-------------|--------|------------|----|
| A           | 8.00   | 6.00-10.75 | 31 |
| B           | 8.00   | 6.00-10.00 | 31 |
| Total       | 7.5    | 6.0-10.4   | 63 |
